# Supplementary material
Source: PubMed Central journal article supplement (PMC2741616)
Supplement: NIHMS131863-supplement-SUPPLEMENT.pdf [file NIHMS131863-supplement-SUPPLEMENT.pdf]

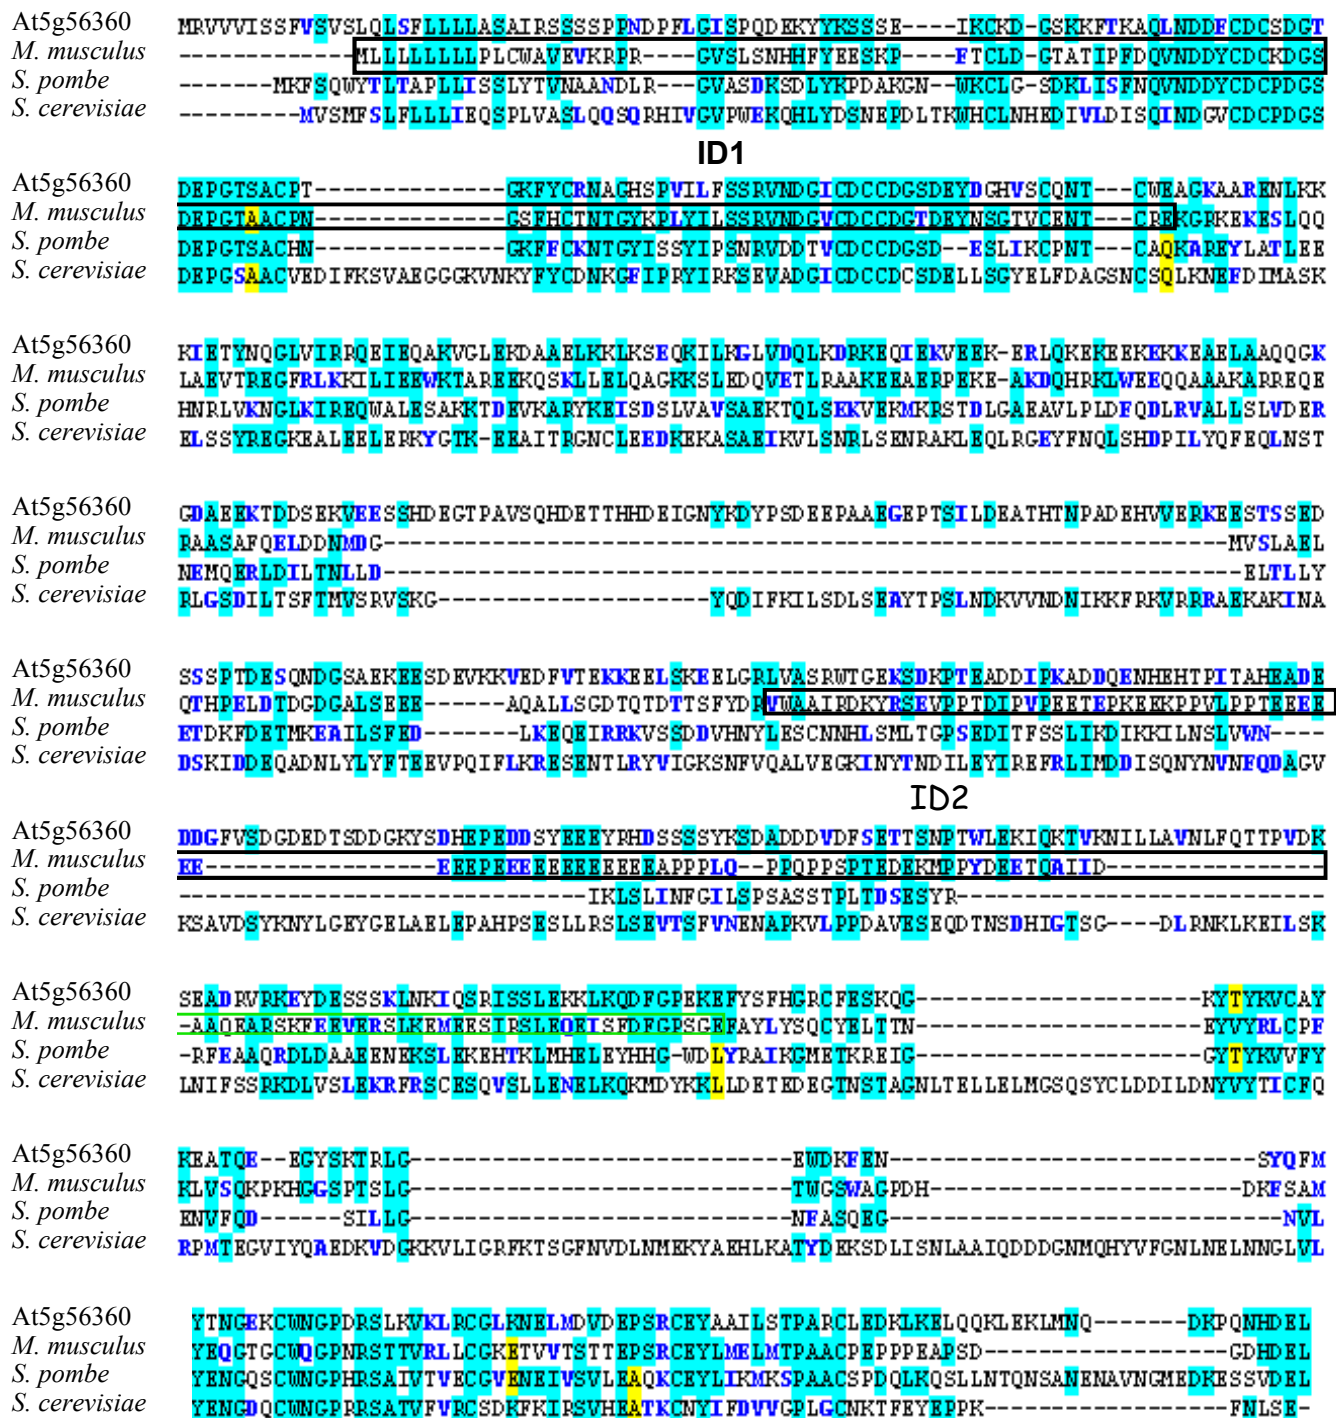

Figure S1 : Alignment of the conserved regions of *GCSI $\beta$*  subunit plant homologue (At5g56360) and the *GCSI $\beta$*  subunit from *M. musculus* (NP\_032951), *S. pombe* (NP\_588052) and *S. cerevisiae* (NP\_010507). Residues identical in all sequences are highlighted. The motifs ID1 and ID2 involved in the interaction with *GCSI $\alpha$*  subunit in mouse are framed. We can observe 42.5%, 39% and 36% similarities with *M. musculus*, *S. pombe*, and *S. cerevisiae*, respectively.
